# Supplementary material for: New Method for Examining Association Between Obesity and Diabetes With Age Among Korean Adults
Source: Research Square preprint supplement (doi:10.21203/rs.3.rs-764147/v1), 2021-08-05
Supplement: Supplementary file 1 [file d2cf6758a9c3dd4078861ce7.docx]

**Title:**

**New method for examining association between obesity and diabetes with age among Korean adults**

**Author:**

**Nam Lyong Kang***

Department of Nanomechatronics Engineering, Pusan National University, Busan, 46241, Republic of Korea

**Table S1** Lump mean values of the BMI (m2), WHT2R (cm-1), and FBG () of males.

| N | age | BMI | | WHT2R | | FBG | |
| --- | --- | --- | --- | --- | --- | --- | --- |
| M | SD | M | SD | M | SD |
| 30 | 20.5 | 23.95 | 3.34 | 27.17 | 4.12 | 88.2 | 6.1 |
| 56 | 22.5 | 23.09 | 3.03 | 27.07 | 3.26 | 88.5 | 8.1 |
| 61 | 24.5 | 23.40 | 3.53 | 26.50 | 3.13 | 90.7 | 6.8 |
| 54 | 26.5 | 24.64 | 3.30 | 27.81 | 3.10 | 90.2 | 8.2 |
| 44 | 28.5 | 24.90 | 3.01 | 27.74 | 2.96 | 92.5 | 9.5 |
| 58 | 30.5 | 24.07 | 3.25 | 28.02 | 2.91 | 94.3 | 12.9 |
| 79 | 32.5 | 24.66 | 2.72 | 28.18 | 2.57 | 93.9 | 8.85 |
| 87 | 34.5 | 24.82 | 3.75 | 28.25 | 3.15 | 95.3 | 11.6 |
| 86 | 36.5 | 24.67 | 3.14 | 28.60 | 2.91 | 95.0 | 11.0 |
| 106 | 38.5 | 24.86 | 2.94 | 28.79 | 2.91 | 95.7 | 10.4 |
| 86 | 40.5 | 24.85 | 3.40 | 28.97 | 3.04 | 98.8 | 13.5 |
| 93 | 42.5 | 25.05 | 3.26 | 29.25 | 2.92 | 100.2 | 16.2 |
| 109 | 44.5 | 24.93 | 3.19 | 29.34 | 2.96 | 102.3 | 19.2 |
| 91 | 46.5 | 24.53 | 2.92 | 29.15 | 2.84 | 99.8 | 13.4 |
| 83 | 48.5 | 25.14 | 3.13 | 29.99 | 3.12 | 102.4 | 15.0 |
| 81 | 50.5 | 25.32 | 2.96 | 30.49 | 2.64 | 104.7 | 16.5 |
| 71 | 52.5 | 24.01 | 2.63 | 29.98 | 2.79 | 105.1 | 18.8 |
| 93 | 54.5 | 24.39 | 2.86 | 29.69 | 2.68 | 102.2 | 15.2 |
| 80 | 56.5 | 24.44 | 2.55 | 30.27 | 2.75 | 104.6 | 15.6 |
| 95 | 58.5 | 24.33 | 2.82 | 30.32 | 2.98 | 106.7 | 19.2 |
| 78 | 60.5 | 24.18 | 2.91 | 30.46 | 2.67 | 108.7 | 18.5 |
| 80 | 62.5 | 24.47 | 2.74 | 31.58 | 2.90 | 109.4 | 19.8 |
| 77 | 64.5 | 23.96 | 2.43 | 30.92 | 2.76 | 105.3 | 18.0 |

Abbreviations: BMI = body mass index; WHT2R = waist circumference divided by the square of the height; FBG = fasting blood glucose; N = the number of subjects in a lump; M = the lump mean values for the ranges; SD = standard deviation.

**Table S2** Lump mean values of the BMI (m2), WHT2R (cm-1), and FBG () of females.

| N | age | BMI | | WHT2R | | FBG | |
| --- | --- | --- | --- | --- | --- | --- | --- |
| M | SD | M | SD | M | SD |
| 63 | 20.5 | 20.90 | 2.24 | 26.78 | 2.62 | 87.7 | 7.5 |
| 55 | 22.5 | 22.06 | 3.72 | 27.70 | 3.75 | 89.5 | 8.8 |
| 59 | 24.5 | 21.26 | 2.68 | 27.40 | 3.62 | 89.0 | 8.6 |
| 63 | 26.5 | 21.35 | 3.13 | 27.73 | 2.95 | 88.2 | 8.3 |
| 58 | 28.5 | 21.63 | 2.68 | 27.98 | 3.18 | 88.4 | 7.7 |
| 73 | 30.5 | 22.31 | 3.58 | 28.96 | 3.82 | 88.4 | 9.0 |
| 101 | 32.5 | 22.52 | 3.55 | 29.44 | 4.48 | 89.4 | 7.2 |
| 126 | 34.5 | 22.79 | 3.73 | 30.15 | 3.99 | 90.9 | 8.5 |
| 134 | 36.5 | 22.82 | 3.31 | 29.68 | 3.55 | 92.4 | 10.5 |
| 112 | 38.5 | 22.40 | 2.90 | 29.75 | 3.60 | 92.1 | 10.1 |
| 92 | 40.5 | 22.55 | 3.51 | 29.93 | 3.70 | 92.6 | 10.0 |
| 108 | 42.5 | 22.52 | 3.22 | 30.06 | 3.52 | 93.1 | 11.1 |
| 135 | 44.5 | 23.19 | 3.11 | 30.47 | 3.55 | 93.5 | 9.53 |
| 117 | 46.5 | 23.29 | 2.95 | 30.88 | 3.67 | 97.0 | 13.6 |
| 104 | 48.5 | 23.47 | 3.46 | 31.59 | 4.17 | 98.3 | 16.3 |
| 99 | 50.5 | 23.49 | 3.10 | 31.43 | 3.42 | 95.8 | 12.5 |
| 114 | 52.5 | 23.64 | 2.75 | 31.90 | 3.34 | 98.0 | 14.3 |
| 122 | 54.5 | 24.01 | 3.12 | 32.94 | 3.64 | 99.3 | 14.5 |
| 135 | 56.5 | 23.28 | 2.91 | 32.36 | 3.71 | 97.0 | 13.4 |
| 113 | 58.5 | 23.85 | 2.81 | 33.05 | 3.38 | 98.9 | 15.7 |
| 114 | 60.5 | 23.98 | 2.43 | 33.95 | 3.44 | 100.7 | 16.3 |
| 89 | 62.5 | 24.03 | 3.01 | 34.14 | 3.72 | 101.1 | 17.3 |
| 115 | 64.5 | 24.08 | 2.65 | 34.56 | 3.60 | 101.0 | 16.8 |

Abbreviations: BMI = body mass index; WHT2R = waist circumference divided by the square of the height; FBG = fasting blood glucose; N = the number of subjects in a lump; M = the lump mean values for the ranges; SD = standard deviation.
